# Supplementary material for: Novel conjugated polymers based on bis-dithieno[3,2-b;2′,3′-d]pyrrole vinylene donor and diketopyrrolopyrrole acceptor: side chain engineering in organic field effect transistors
Source: Royal Society of Chemistry journal article supplement (doi:10.1039/c7py01340j), 2017-11-17
Supplement: c7py01340j1.pdf [file c7py01340j1.pdf]

## Electronic Supplementary Information (ESI)

### Novel conjugated polymers based on bis-dithieno[3,2-b;2',3'-d] pyrrole vinylene donor and diketopyrrolopyrrole acceptor: side chain engineering in organic field effect transistors

Fang-Ju Lin,<sup>a,b</sup> Song-Di Lin,<sup>a</sup> Chih-Hao Chin,<sup>b</sup> Wei-Tsung Chuang,<sup>\*b</sup> and Chain-Shu Hsu<sup>\*a</sup>

<sup>a</sup>Department of Applied Chemistry, National Chiao Tung University, 1001 Ta-Hsueh Road, Hsinchu, 30029, Taiwan

<sup>b</sup>National Synchrotron Radiation Research Center, 101 Hsin-Ann Road, Hsinchu, 30076, Taiwan

\*Corresponding author: E-mail: cshsu@mail.nutc.edu.tw (C. S. H.) and weitsung@nsrrc.org.tw (W. T. C.)

#### Table of Contents

|                                                                                                                                                |     |
|------------------------------------------------------------------------------------------------------------------------------------------------|-----|
| 1. Analytical Characterization of Materials. ....                                                                                              | S2  |
| Fig. S1 <sup>1</sup> H NMR Spectra of B(C <sub>12</sub> -DTP)V .....                                                                           | S2  |
| Fig. S2 <sup>13</sup> C NMR Spectra of B(C <sub>12</sub> -DTP)V .....                                                                          | S3  |
| Fig. S3 Mass Spectra of B(C <sub>12</sub> -DTP)V.....                                                                                          | S4  |
| 2. Characterization of PB(C <sub>12</sub> DTP)V-DTDPP-C <sub>12</sub> and PB(C <sub>12</sub> DTP)V-DTDPP-C <sub>12</sub> C <sub>8</sub> . .... | S5  |
| 2.1 Thermalgravimetric Analysis (TGA) .....                                                                                                    | S5  |
| Fig. S4 Thermogravimetric analysis. ....                                                                                                       | S5  |
| 2.2 Differential Scanning Calorimetry (DSC).....                                                                                               | S6  |
| Fig. S5 DSC thermograms .....                                                                                                                  | S6  |
| 2.3 AFM analysis.....                                                                                                                          | S7  |
| Fig. S6 Tapping-mode AFM phase images .....                                                                                                    | S7  |
| Fig. S7 Tapping-mode AFM height images .....                                                                                                   | S8  |
| 2.4 GIXD measurements.....                                                                                                                     | S9  |
| Fig. S8 2D GIXD pattern .....                                                                                                                  | S9  |
| Fig. S9 In-plane profiles and Gaussian fitting peaks .....                                                                                     | S9  |
| 2.5 OTFT device performances.....                                                                                                              | S10 |
| Table S1. Off-centre spin coated OTFT device performances for B(DTP)V-DTDPP polymers measured under nitrogen .....                             | S10 |

## 1. Analytical Characterization of Materials.

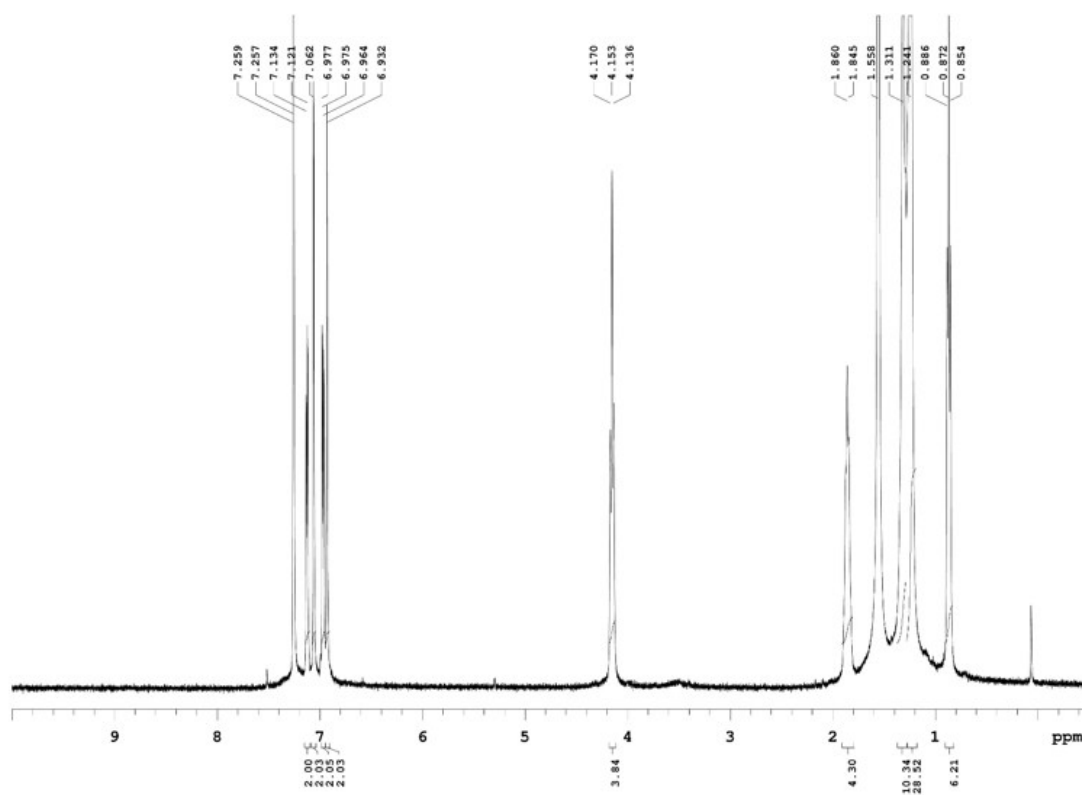

**Fig. S1**  $^1\text{H}$  NMR Spectra of  $\text{B}(\text{C}_{12}\text{-DTP})\text{V}$

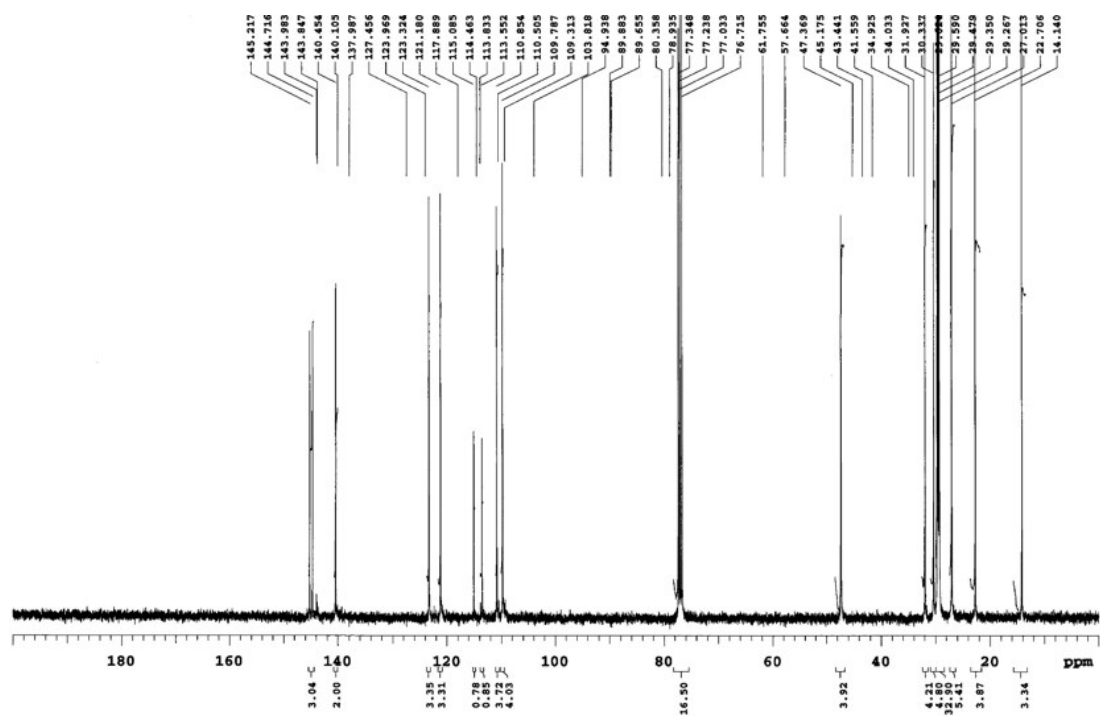

Fig. S2  $^{13}\text{C}$  NMR Spectra of  $\text{B}(\text{C}_{12}\text{-DTP})\text{V}$

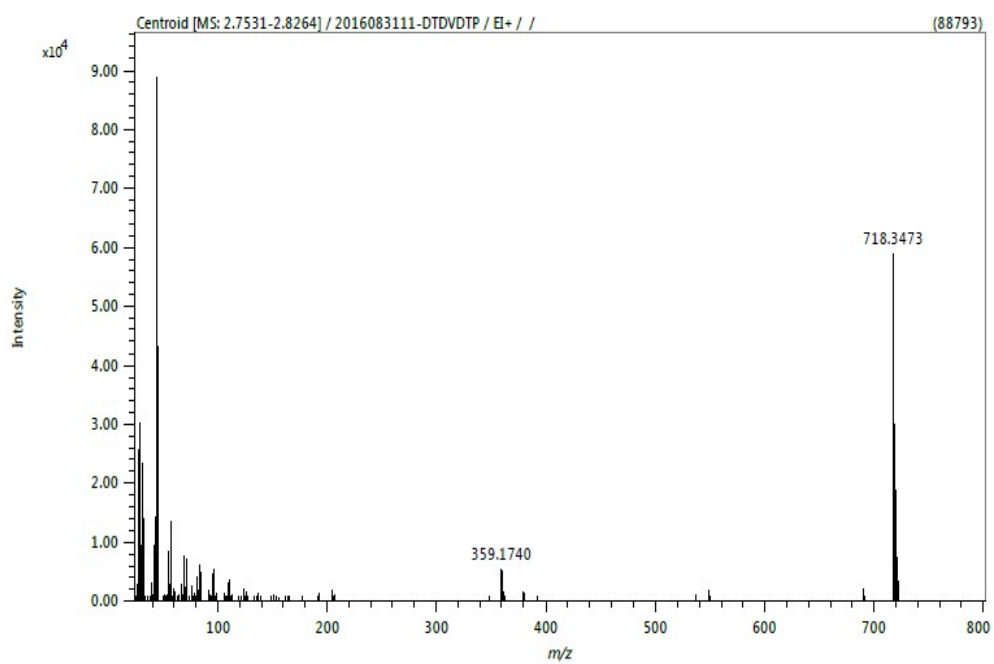

**Fig. S3** Mass Spectra of B(C<sub>12</sub>-DTP)V

## 2. Characterization of PB(C<sub>12</sub>DTP)V-DTDPP-C<sub>12</sub> and PB(C<sub>12</sub>DTP)V-DTDPP-C<sub>12</sub>C<sub>8</sub>.

### 2.1 Thermalgravimetric Analysis (TGA)

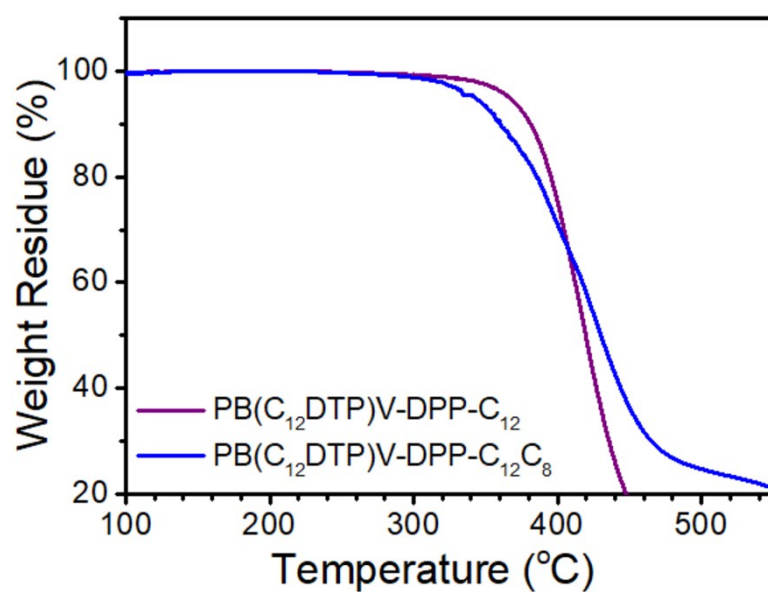

**Fig. S4** Thermogravimetric analysis of PB(C<sub>12</sub>DTP)V-DTDPP-C<sub>12</sub> and PB(C<sub>12</sub>DTP)V-DTDPP-C<sub>12</sub>C<sub>8</sub> at a ramping rate of 10 °C min<sup>-1</sup>.

## 2.2 Differential Scanning Calorimetry (DSC)

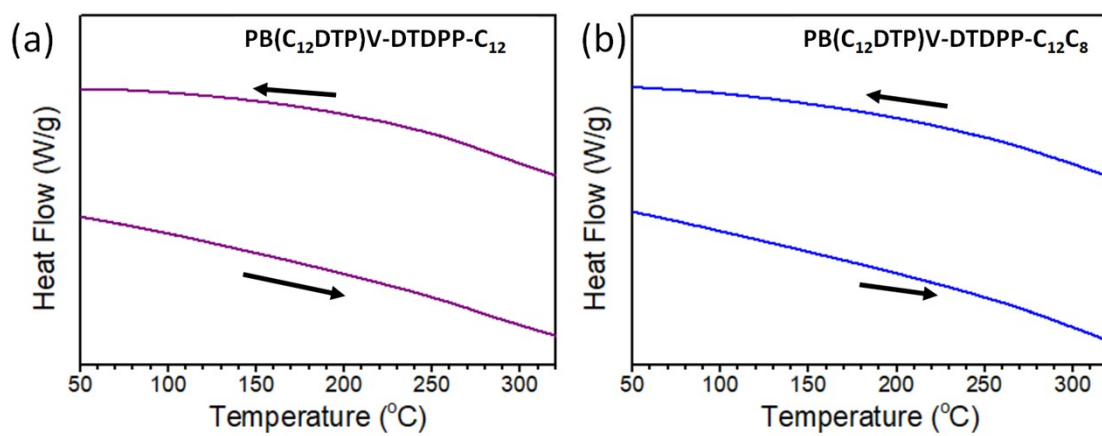

**Fig. S5** DSC thermograms of PB(C<sub>12</sub>DTP)V-DTDPP-C<sub>12</sub> and PB(C<sub>12</sub>DTP)V-DTDPP-C<sub>12</sub>C<sub>8</sub> polymers.

### 2.3 AFM analysis

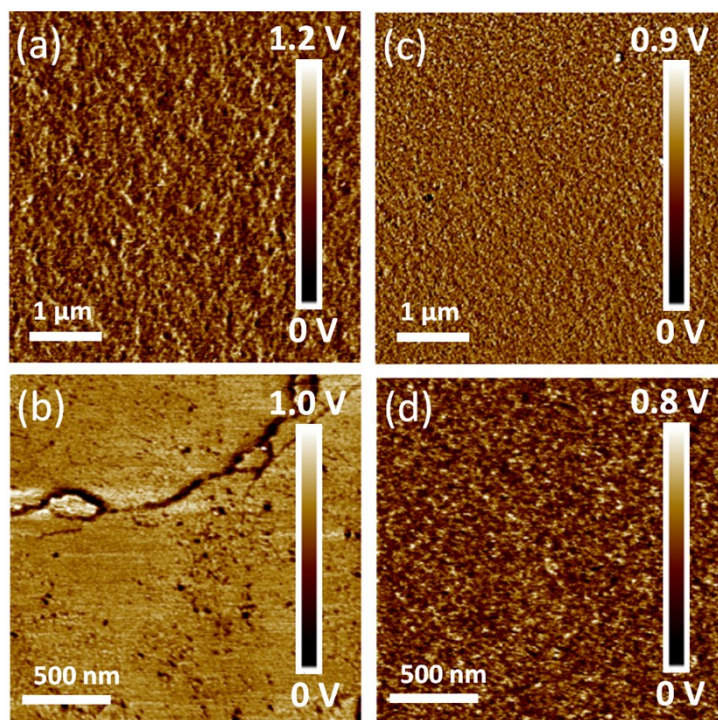

**Fig. S6** Tapping-mode AFM phase images of (a, b) PB(C<sub>12</sub>DTP)V-DTDPP-C<sub>12</sub> film after annealing at 220 °C and (c, d) PB(C<sub>12</sub>DTP)V-DTDPP-C<sub>12</sub>C<sub>8</sub> film after annealing at 180 °C. Thin film was fabricated by 1,2-dichlorobenzene with spin rate 2000 rpm.

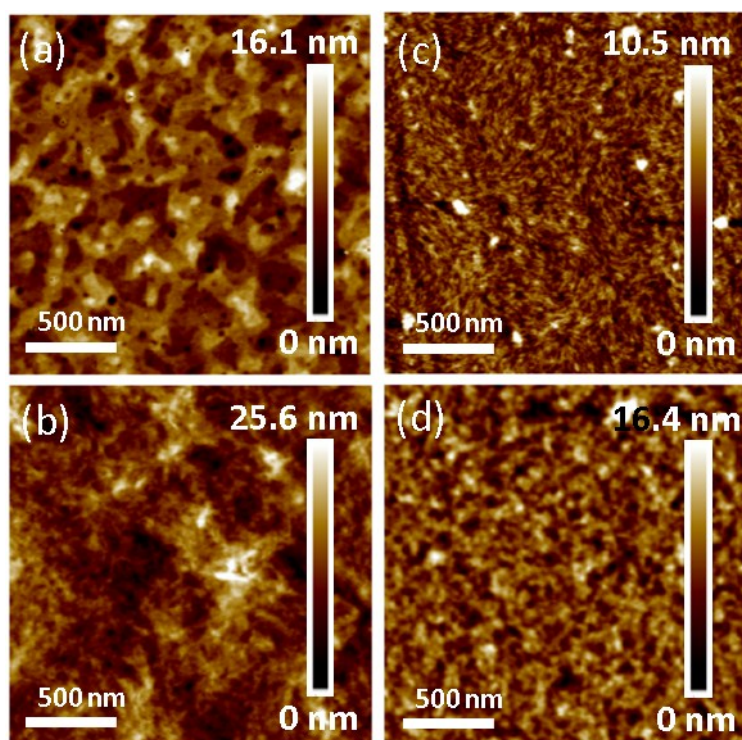

**Fig. S7** Tapping-mode AFM height images of (a, b) PB(C<sub>12</sub>DTP)V-DTDPP-C<sub>12</sub> film after annealing at 220 °C and (c, d) PB(C<sub>12</sub>DTP)V-DTDPP-C<sub>12</sub>C<sub>8</sub> film after annealing at 180 °C. PB(C<sub>12</sub>DTP)V-DTDPP-C<sub>12</sub> film was fabricated by (a) chlorobenzene with spin rate 2500 rpm ( $R_t = 2.49$  nm), and (b) 1,2-dichlorobenzene with spin rate 1500 rpm ( $R_t = 4.17$  nm). PB(C<sub>12</sub>DTP)V-DTDPP-C<sub>12</sub>C<sub>8</sub> film was fabricated by (c) chlorobenzene with spin rate 2500 rpm ( $R_t = 1.64$  nm), and (d) 1,2-dichlorobenzene with spin rate 1500 rpm ( $R_t = 2.66$  nm).



## 2.4 GIXD measurements

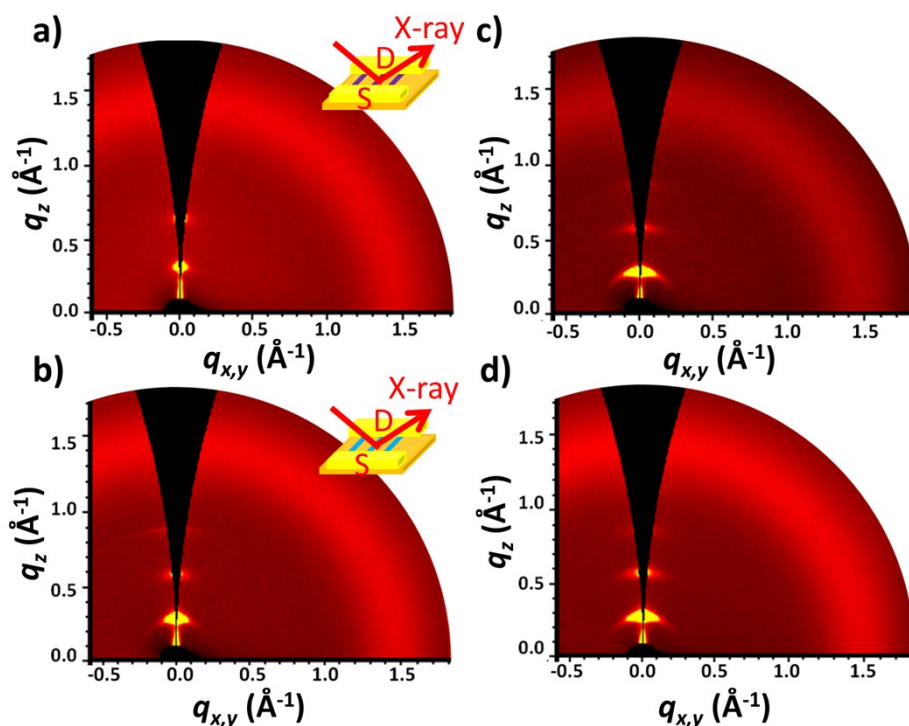

**Fig. S8** 2D GIXD pattern of (a) the OCSC PB(C<sub>12</sub>DTP)V-DTDPP-C<sub>12</sub>, (b) the OCSC PB(C<sub>12</sub>DTP)V-DTDPP-C<sub>12</sub>C<sub>8</sub>, (c) the spin-coated PB(C<sub>12</sub>DTP)V-DTDPP-C<sub>12</sub> and (d) the spin-coated PB(C<sub>12</sub>DTP)V-DTDPP-C<sub>12</sub>C<sub>8</sub> films.

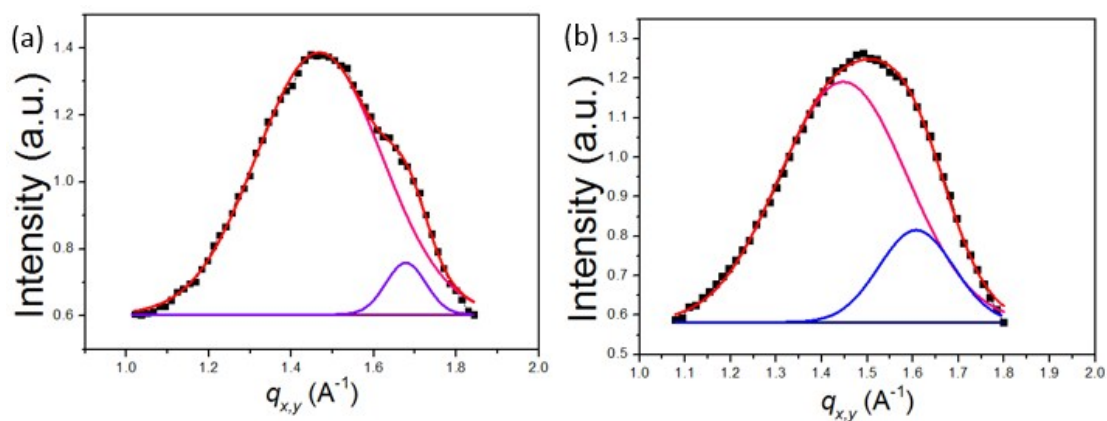

**Fig. S9** In-plane profiles (dot) and Gaussian fitting peaks (color lines), (a) for the OCSC PB(C<sub>12</sub>DTP)V-DTDPP-C<sub>12</sub>, and (b) for the OCSC PB(C<sub>12</sub>DTP)V-DTDPP-C<sub>12</sub>C<sub>8</sub> films.

## 2.5 OTFT device performances

**Table S1.** Off-centre spin coated OTFT device performances for B(DTP)V-DTDPP polymers measured under nitrogen

| Polymers                                          | Solvent | Spin rate<br>(rpm) | Coating<br>direction | T <sub>a</sub><br>(°C) <sup>a</sup> | $\mu_{h, adv}$<br>( $\mu_{h, max}$ )<br>(cm <sup>2</sup> V <sup>-1</sup> s <sup>-1</sup> ) <sup>b</sup> | V <sub>c</sub> <sup>th</sup><br>(V) | I <sub>on</sub> /I <sub>off</sub> |
|---------------------------------------------------|---------|--------------------|----------------------|-------------------------------------|---------------------------------------------------------------------------------------------------------|-------------------------------------|-----------------------------------|
| <b>PB(DTP)V-DTDPP-C<sub>12</sub></b>              | ODCB    | 2000               | parallel             | RT                                  | 0.073<br>(0.086)                                                                                        | -22                                 | 10 <sup>1</sup> -10 <sup>2</sup>  |
|                                                   | ODCB    | 2000               | parallel             | 50                                  | 0.092<br>(0.10)                                                                                         | -24                                 | 10 <sup>1</sup> -10 <sup>2</sup>  |
|                                                   | ODCB    | 2000               | parallel             | 240                                 | 0.008<br>(0.011)                                                                                        | -22                                 | 10 <sup>1</sup> -10 <sup>2</sup>  |
|                                                   | ODCB    | 1500               | parallel             | 220                                 | 0.091<br>(0.16)                                                                                         | -12                                 | 10 <sup>1</sup> -10 <sup>2</sup>  |
|                                                   | CB      | 2500               | parallel             | 220                                 | 0.13<br>(0.19)                                                                                          | -29                                 | 10 <sup>1</sup> -10 <sup>2</sup>  |
|                                                   | CB      | 2000               | parallel             | 220                                 | 0.051<br>(0.064)                                                                                        | -15                                 | 10 <sup>1</sup> -10 <sup>2</sup>  |
| <b>PB(DTP)V-DTDPP-C<sub>12</sub>C<sub>8</sub></b> | ODCB    | 2000               | parallel             | RT                                  | 0.098<br>(0.11)                                                                                         | -18                                 | 10 <sup>1</sup> -10 <sup>2</sup>  |
|                                                   | ODCB    | 2000               | parallel             | 50                                  | 0.13<br>(0.26)                                                                                          | -25                                 | 10 <sup>1</sup> -10 <sup>2</sup>  |
|                                                   | ODCB    | 1500               | parallel             | 180                                 | 0.55<br>(0.78)                                                                                          | -21                                 | 10 <sup>1</sup> -10 <sup>2</sup>  |
|                                                   | CB      | 2500               | parallel             | 180                                 | 0.18<br>(0.24)                                                                                          | -20                                 | 10 <sup>1</sup> -10 <sup>2</sup>  |
|                                                   | CB      | 2000               | parallel             | 180                                 | 0.062<br>(0.083)                                                                                        | -32                                 | 10 <sup>1</sup> -10 <sup>2</sup>  |

<sup>a</sup>T<sub>a</sub> indicates annealing temperature. <sup>b</sup>Average mobilities and maximum values of hole mobility are shown in parentheses (more than 20 devices were tested for each polymer). <sup>c</sup>Averaged value of 20 devices. ODCB and CB indicate 1,2-dichlorobenzene and chlorobenzene, respectively.
